# Supplementary material for: Thermochromic hydrogels with an adjustable critical response temperature for temperature monitoring and smart windows
Source: Royal Society of Chemistry journal article supplement (doi:10.1039/d2tc04347e), 2022-12-05
Supplement: d2tc04347e1.pdf [file d2tc04347e1.pdf]

Supporting Information of

Thermochromic Hydrogels with Adjustable Critical Response Temperature for  
Temperature Monitoring and Smart Windows

Zhengkun Yu, Yuanyuan Yang, Chang Shen, Linhan Mao, Congcong Cui, Zhaoxia Chen\*,

Yuhong Zhang\*

Hubei Collaborative Innovation Center for Advanced Organic Chemical Materials, Hubei  
Provincial Engineering Center of Performance Chemicals, College of Chemistry and Chemical  
Engineering, Hubei University, Wuhan 430062, China

E-mail address: chenzhaoxia@hubu.edu.cn (Z.X. Chen); zhangyuhong@hubu.edu.cn (Y.H.  
Zhang).

Table S1 Recipes for the micelles and hydrogels.

| Sample         | SDS<br>(mM) | Inorganic<br>salt                    | Inorganic salt<br>(mM) | PTH<br>(mM) | H <sub>2</sub> O<br>(mL) | PEG<br>(wt%) | Aam<br>(mM) | PEGD      | APS  | TEME       |
|----------------|-------------|--------------------------------------|------------------------|-------------|--------------------------|--------------|-------------|-----------|------|------------|
|                |             |                                      |                        |             |                          |              |             | A<br>(μL) | (mM) | DA<br>(μL) |
| Pgel-micelle-0 | 0.23        | AlCl <sub>3</sub> ·6H <sub>2</sub> O | 1.04                   | 0.74        | 12                       | 0            | 0           | 0         | 0    | 0          |
| Pgel-micelle-1 | 0.23        | AlCl <sub>3</sub> ·6H <sub>2</sub> O | 1.04                   | 0.74        | 12                       | 1.37         | 0           | 0         | 0    | 0          |
| Pgel-micelle-2 | 0.23        | AlCl <sub>3</sub> ·6H <sub>2</sub> O | 1.04                   | 0.74        | 12                       | 2.70         | 0           | 0         | 0    | 0          |
| Pgel-micelle-3 | 0.23        | AlCl <sub>3</sub> ·6H <sub>2</sub> O | 1.04                   | 0.74        | 12                       | 4.00         | 0           | 0         | 0    | 0          |

|                       |      |                                      |      |      |    |       |       |    |      |    |
|-----------------------|------|--------------------------------------|------|------|----|-------|-------|----|------|----|
| Pgel-micelle-4        | 0.23 | AlCl <sub>3</sub> ·6H <sub>2</sub> O | 1.04 | 0.74 | 12 | 6.49  | 0     | 0  | 0    | 0  |
| Pgel-micelle-5        | 0.23 | AlCl <sub>3</sub> ·6H <sub>2</sub> O | 1.04 | 0.74 | 12 | 8.86  | 0     | 0  | 0    | 0  |
| Pgel-micelle-6        | 0.23 | AlCl <sub>3</sub> ·6H <sub>2</sub> O | 1.04 | 0.74 | 12 | 11.10 | 0     | 0  | 0    | 0  |
| PAAm hydrogel         | 0    | 0                                    | 0    | 0    | 12 | 0     | 28.14 | 17 | 0.18 | 20 |
| Pgel-PTH-1            | 0.23 | AlCl <sub>3</sub> ·6H <sub>2</sub> O | 1.04 | 0.55 | 12 | 8.86  | 28.14 | 17 | 0.18 | 20 |
| Pgel-PTH-2            | 0.23 | AlCl <sub>3</sub> ·6H <sub>2</sub> O | 1.04 | 0.74 | 12 | 8.86  | 28.14 | 17 | 0.18 | 20 |
| Pgel-PTH-3            | 0.23 | AlCl <sub>3</sub> ·6H <sub>2</sub> O | 1.04 | 1.10 | 12 | 8.86  | 28.14 | 17 | 0.18 | 20 |
| Pgel-PTH-4            | 0.23 | AlCl <sub>3</sub> ·6H <sub>2</sub> O | 1.04 | 1.47 | 12 | 8.86  | 28.14 | 17 | 0.18 | 20 |
| Pgel-PTH-5            | 0.23 | AlCl <sub>3</sub> ·6H <sub>2</sub> O | 1.04 | 1.84 | 12 | 8.86  | 28.14 | 17 | 0.18 | 20 |
| Pgel-PEG-0            | 0.23 | AlCl <sub>3</sub> ·6H <sub>2</sub> O | 1.04 | 0.74 | 12 | 0     | 28.14 | 17 | 0.18 | 20 |
| Pgel-PEG-1            | 0.23 | AlCl <sub>3</sub> ·6H <sub>2</sub> O | 1.04 | 0.74 | 12 | 1.37  | 28.14 | 17 | 0.18 | 20 |
| Pgel-PEG-2            | 0.23 | AlCl <sub>3</sub> ·6H <sub>2</sub> O | 1.04 | 0.74 | 12 | 2.70  | 28.14 | 17 | 0.18 | 20 |
| Pgel-PEG-3            | 0.23 | AlCl <sub>3</sub> ·6H <sub>2</sub> O | 1.04 | 0.74 | 12 | 4.00  | 28.14 | 17 | 0.18 | 20 |
| Pgel-PEG-4            | 0.23 | AlCl <sub>3</sub> ·6H <sub>2</sub> O | 1.04 | 0.74 | 12 | 6.49  | 28.14 | 17 | 0.18 | 20 |
| Pgel-PEG-5            | 0.23 | AlCl <sub>3</sub> ·6H <sub>2</sub> O | 1.04 | 0.74 | 12 | 8.86  | 28.14 | 17 | 0.18 | 20 |
| Pgel-PEG-6            | 0.23 | AlCl <sub>3</sub> ·6H <sub>2</sub> O | 1.04 | 0.74 | 12 | 11.10 | 28.14 | 17 | 0.18 | 20 |
| Pgel-K <sup>+</sup>   | 0.23 | KCl                                  | 1.04 | 0.55 | 12 | 8.86  | 28.14 | 17 | 0.18 | 20 |
| Pgel-Na <sup>+</sup>  | 0.23 | NaCl                                 | 1.04 | 0.55 | 12 | 8.86  | 28.14 | 17 | 0.18 | 20 |
| Pgel-Li <sup>+</sup>  | 0.23 | LiCl                                 | 1.04 | 0.55 | 12 | 8.86  | 28.14 | 17 | 0.18 | 20 |
| Pgel-Mg <sup>2+</sup> | 0.23 | MgCl <sub>2</sub> ·6H <sub>2</sub> O | 1.04 | 0.55 | 12 | 8.86  | 28.14 | 17 | 0.18 | 20 |
| Pgel-Al <sup>3+</sup> | 0.23 | AlCl <sub>3</sub> ·6H <sub>2</sub> O | 1.04 | 0.55 | 12 | 8.86  | 28.14 | 17 | 0.18 | 20 |

Table S2 Comparison of the smart window materials based on thermochromic properties.

| Materials | State | Stimulation                     | lowest T <sub>k</sub> (°C) | Irradiation times (s) | Temperature amplification (°C) | Ref. |
|-----------|-------|---------------------------------|----------------------------|-----------------------|--------------------------------|------|
| ATO       | Solid | Temperature                     | 32                         | 600                   | 4.5                            | 1    |
| Gel-NaCl  | Solid | Temperature/<br>electricity /pH | 20                         | 3600                  | 6.1                            | 2    |
| PS gels   | Solid | Temperature                     | 28                         | /                     | /                              | 3    |
| HPC       | Solid | Temperature                     | 50                         | 3600                  | 13.3                           | 4    |

|                      |              |                                     |           |            |            |             |
|----------------------|--------------|-------------------------------------|-----------|------------|------------|-------------|
| PNIPAM               | Liquid       | Temperature                         | 32        | 3000       | 11-21      | 5           |
| PNIPAM-AEMA          | Liquid       | Temperature                         | 32.5      | 1800       | 7.9        | 6           |
| VO <sub>2</sub>      | Film         | Temperature                         | 68        | 350        | 5.8        | 7           |
| VO <sub>2</sub> /ATO | Film         | Temperature                         | 36.5      | 600        | 5.0        | 8           |
| TCPs                 | Solid        | Temperature                         | 31        | /          | /          | 9           |
| HPC + Glycerol       | Liquid       | Temperature                         | 40        | 280        | 8.2        | 10          |
| <b>Pgels</b>         | <b>Solid</b> | <b>Temperature/<br/>electricity</b> | <b>16</b> | <b>200</b> | <b>5.6</b> | <b>Ours</b> |

**Note:** ‘/’ means not mentioned.

## References

- 1 Z. Xu, S. Wang, X. Y. Hu, J. Jiang, X. Sun and L. Wang, Sunlight-induced photo-thermochromic supramolecular nanocomposite hydrogel film for energy-saving smart window. *Sol. Rrl.*, 2018, **2** (11), 1800204.
- 2 G. Xu, H. Xia, P. Chen, W. She, H. Zhang, J. Ma, Q. Ruan, W. Zhang and Z. Sun, Thermochromic hydrogels with dynamic solar modulation and regulatable critical response temperature for energy-saving smart windows. *Adv. Funct. Mater.*, 2022, **32** (5), 2109597.
- 3 K. Li, S. Meng, S. Xia, X. Ren and G. Gao, Durable and controllable smart windows based on thermochromic hydrogels. *ACS Appl. Mater. Interfaces*, 2020, **12** (37), 42193-42201.
- 4 Y. Niu, Y. Zhou, D. Du, X. Ouyang, Z. Yang, W. Lan, F. Fan, S. Zhao, Y. Liu and S. Chen, Energy saving and energy generation smart window with active control and antifreezing functions. *Adv. Sci.*, 2022, **9** (6), 2105184.
- 5 Y. Zhou, S. Wang, J. Peng, Y. Tan, C. Li, F. Y. C. Boey and Y. Long, Liquid thermo-responsive smart window derived from hydrogel. *Joule*, 2020, **4** (11), 2458-2474.
- 6 X. H. Li, C. Liu, S. P. Feng and N. X. Fang, Broadband light management with thermochromic hydrogel microparticles for smart windows. *Joule*, 2019, **3** (1), 290-302.
- 7 Y. Cui, Y. Ke, C. Liu, Z. Chen, N. Wang, L. Zhang, Y. Zhou, S. Wang, Y. Gao and Y. Long, Thermochromic VO<sub>2</sub> for energy-efficient smart windows. *Joule*, 2018, **2** (9), 1707-1746.
- 8 J. Song, Y. Zhao, L. Sun, Q. Luo, H. Xu, C. Wang, H. Xin, W. Wu and F. Ma, VO<sub>2</sub>/ATO nanocomposite thin films with enhanced solar modulation and high luminous transmittance for smart windows. *Ceram. Int.*, 2022, **48** (11), 15868-15876.
- 9 T. Wu, T. Yin, X. Hu, G. Nian, S. Qu and W. Yang, A thermochromic hydrogel for Camouflage and soft display. *Adv. Opt. Mater.*, 2020, **8** (9), 2000031.
- 10 C. Nakamura, T. Yamamoto, K. Manabe, T. Nakamura, Y. Einaga and S. Shiratori, Thermoresponsive, freezing-resistant smart windows with adjustable transition temperature made from hydroxypropyl cellulose and glycerol. *Ind. Eng. Chem. Res.*, 2019, **58** (16), 6424-6428.

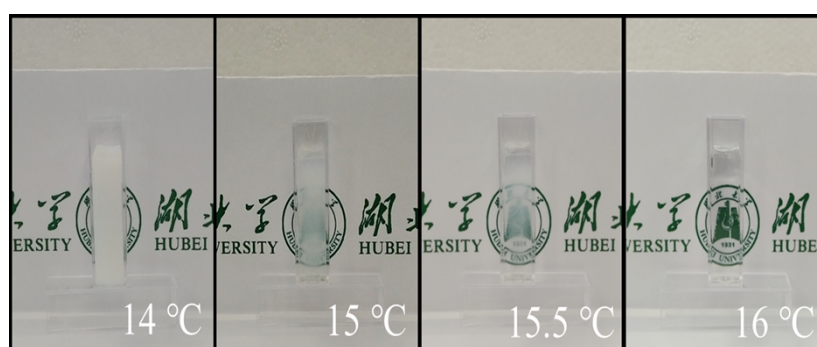

**Fig. S1.** Photographs of Pgel-PTH-1 hydrogel at different temperatures.

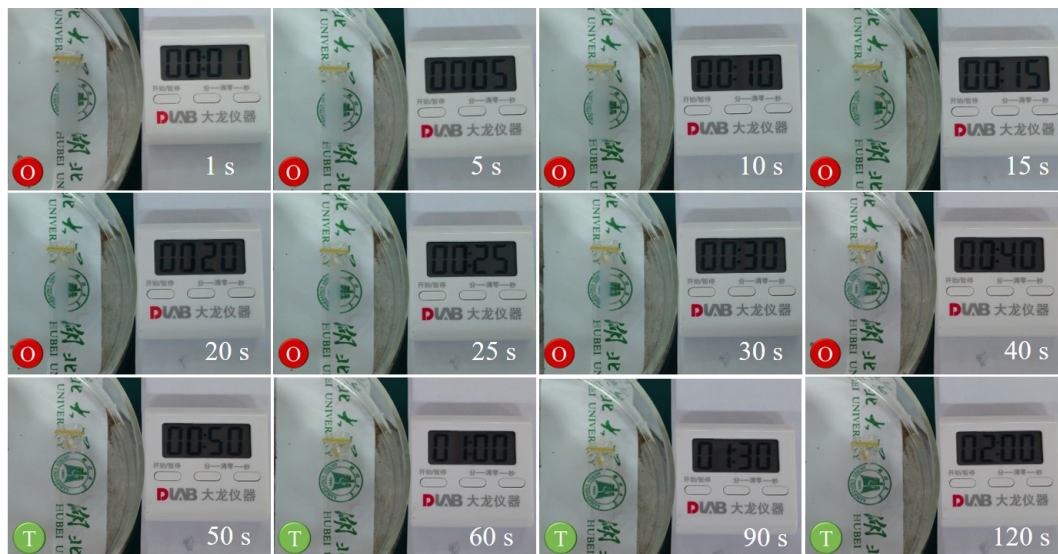

**Fig. S2.** Optical photographs of samples with different heating times at 550 nm.

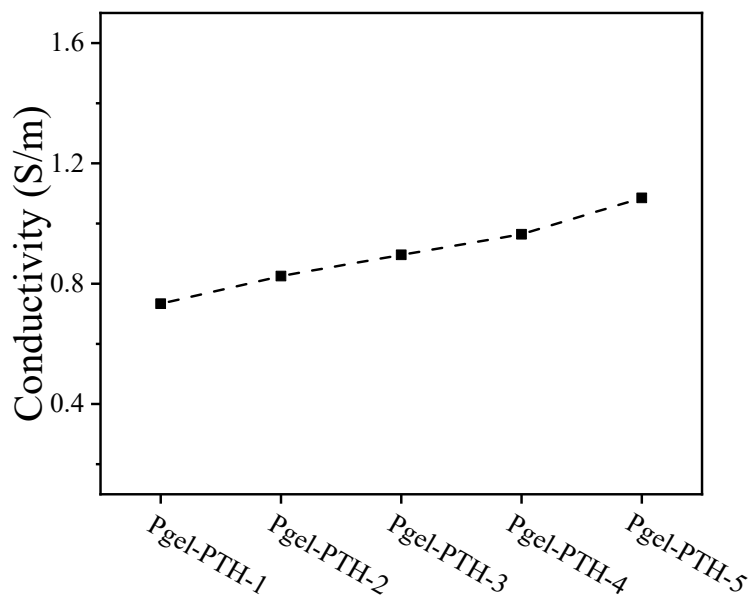

**Fig. S3.** The conductivity of hydrogel samples with different concentrations of PTH.

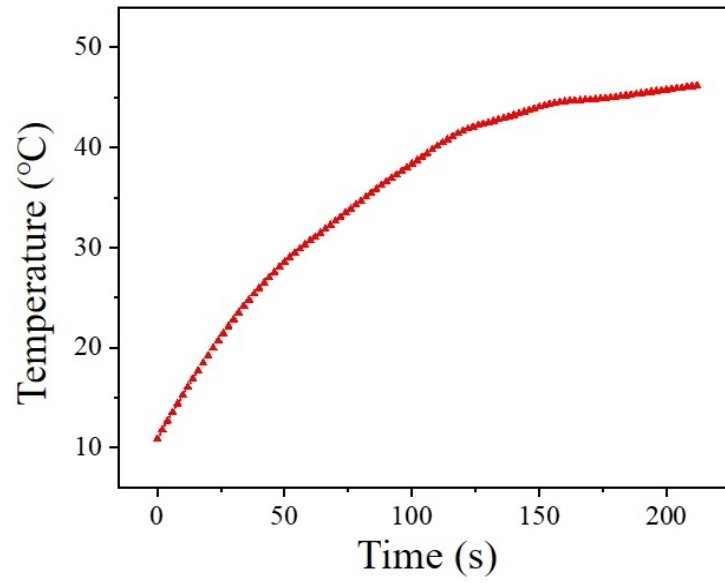

Fig. S4 The temperature of Pgel depends on the power-on time and the external voltage with 10 V.

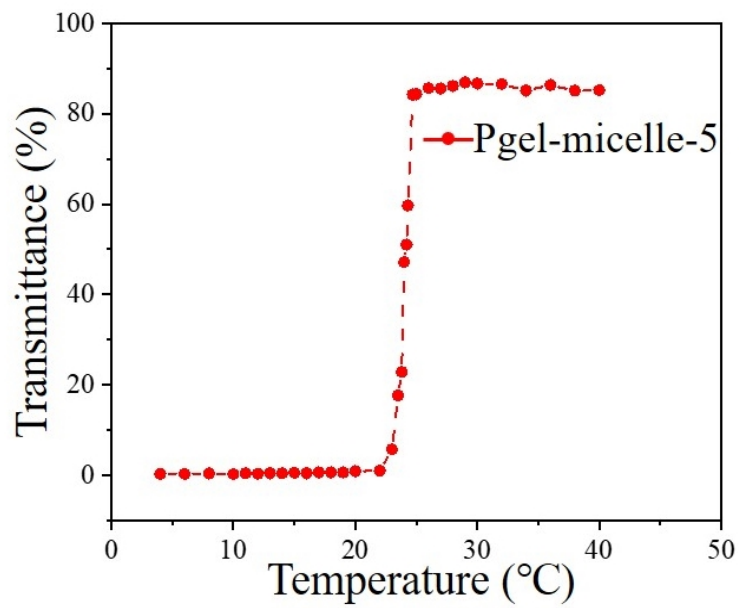

Fig S5. Relationship between temperature and light transmittance of Pgel-micelle-5.

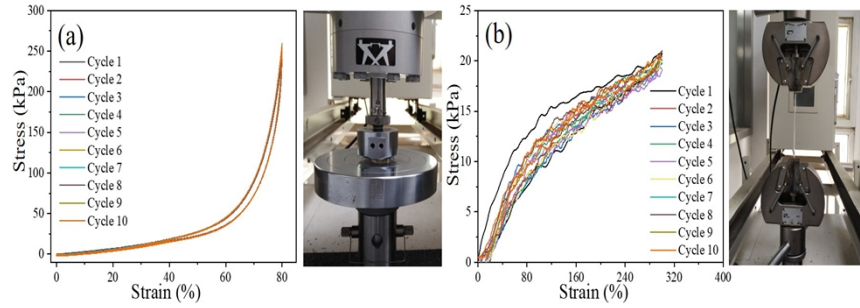

**Fig. S6.** (a) Ten compression stress-strain curves and (b) ten continuous tension and relaxation cycles of Pgel-PTH-2 hydrogel.

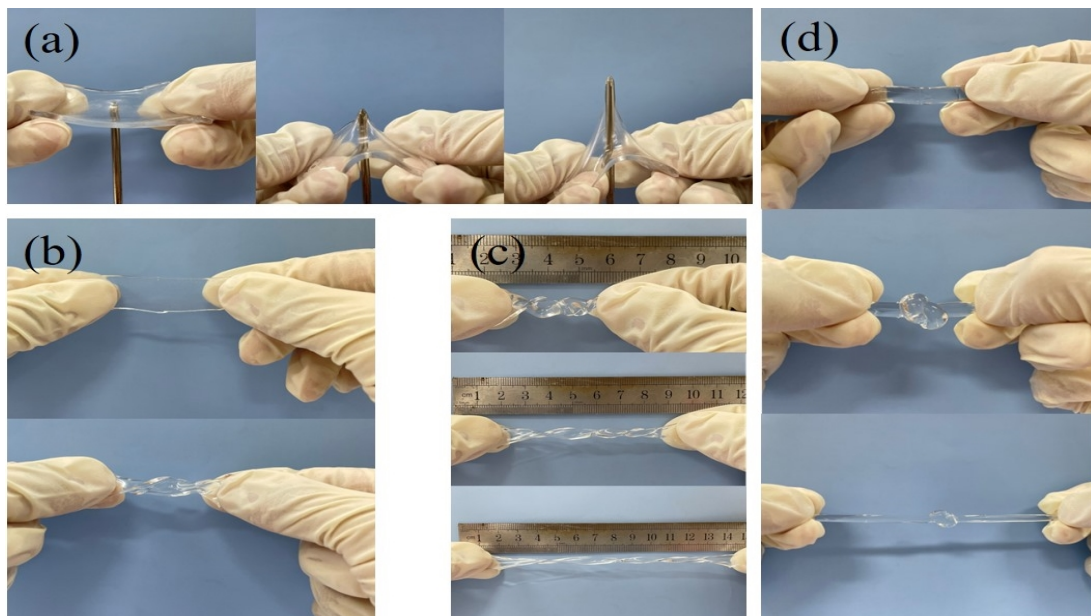

**Fig. S7.** Mechanical properties of Pgel-PTH-2 hydrogel: Exhibition of (a) Puncture resistance and (b) twisting of the hydrogel. Stretching of the (c) twisted and (d) knotted treated hydrogel.

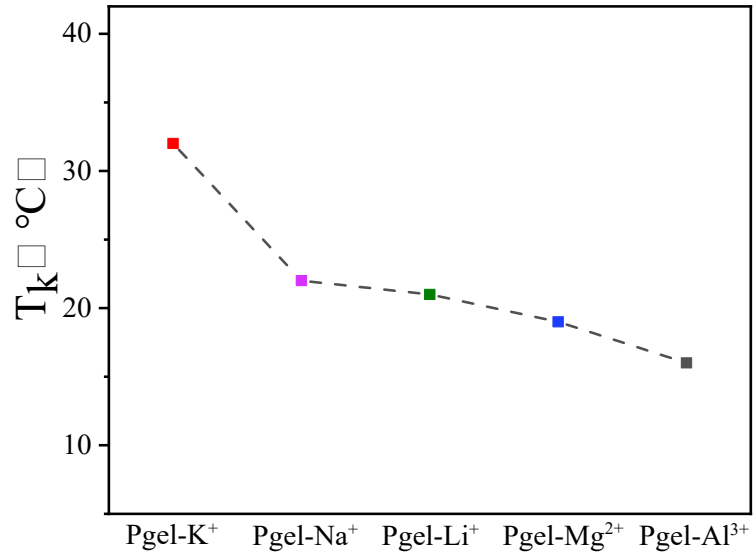

**Fig. S8.** T<sub>k</sub> of hydrogels with different cations.

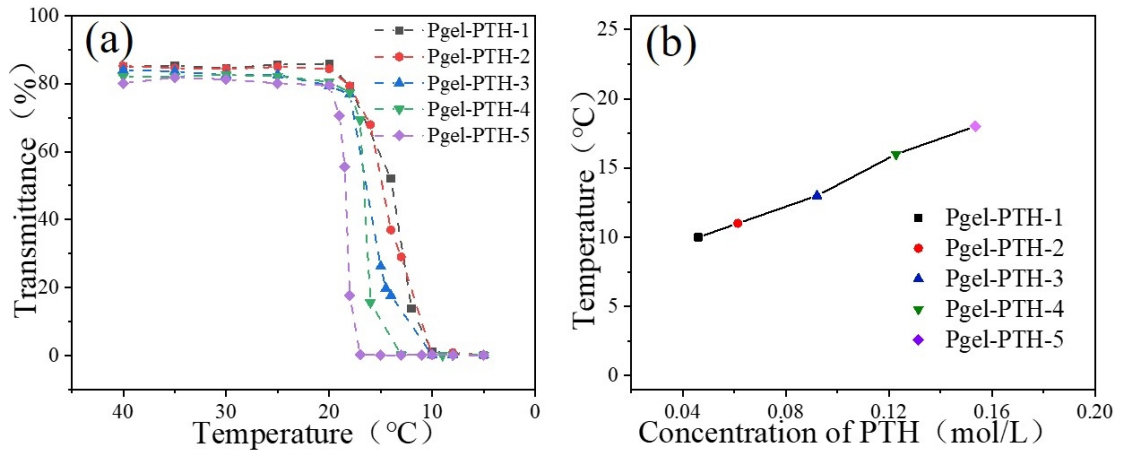

**Fig. S9.** (a) Transmittance and (b) temperature switching of hydrogels with different concentration of PTH during cooling.

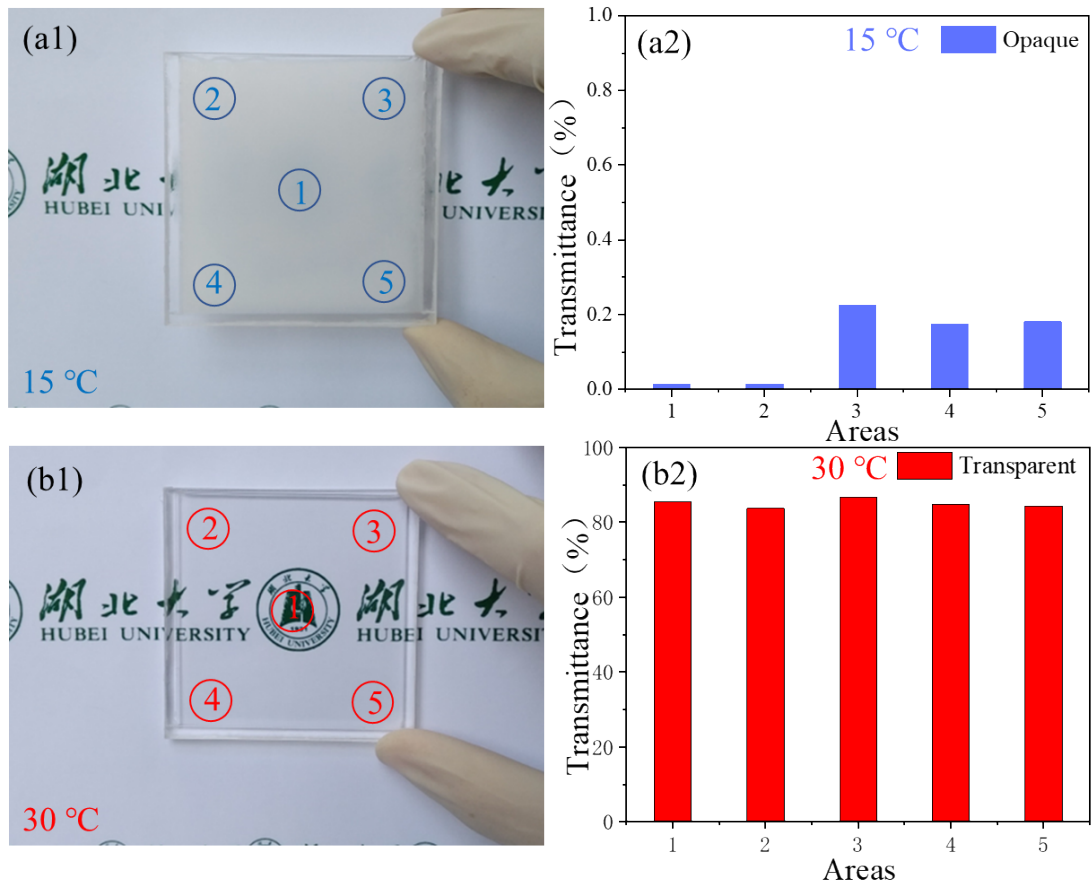

**Fig. S10.** Optical uniformity of hydrogels in (a1) opaque and (b1) transparent states; Transmittance of different areas of the hydrogels in (a2) opaque and (b2) transparent states.



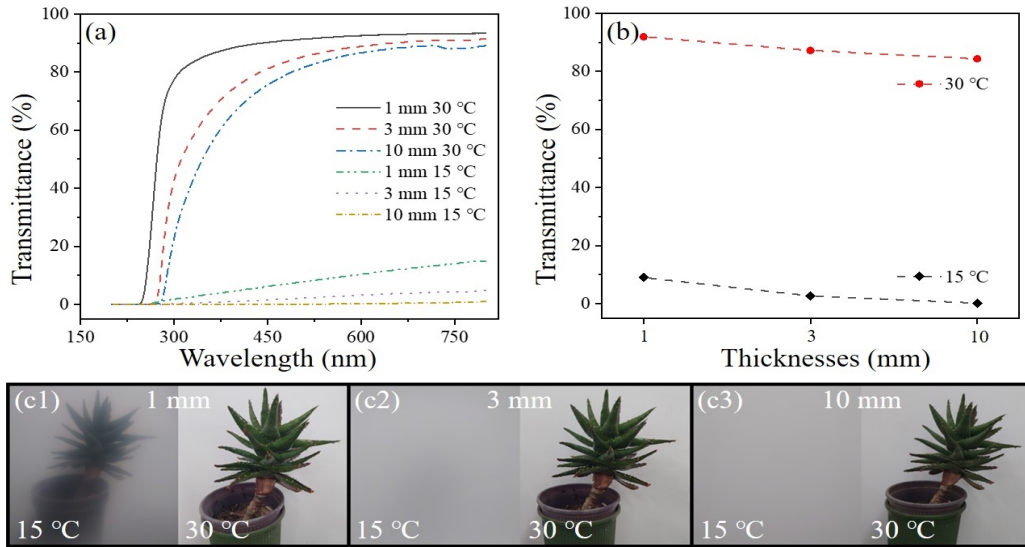

Fig. S11 (a) Transmittance of Pgel-PTH-2 for the 1 mm, 3 mm and 10 mm thickness at 15 °C and 30 °C at a wavelength of 550 nm; (b)The transmittance spectra of 1 mm, 3 mm and 10 mm at 15°C and 30°C, respectively; Optical photos for 1 mm (c1), 3 mm (c2), and 10 mm (c3) sample at 15°C and 30°C, respectively.
